# Supplementary material for: Effects of the SrTiO3 support on visible-light water oxidation with Co3O4 nanoparticles
Source: Royal Society of Chemistry journal article supplement (doi:10.1039/c7dt03444j), 2017-01-01
Supplement: c7dt03444j1.pdf [file c7dt03444j1.pdf]

*Electronic Supplementary Information*

# Effects of the SrTiO<sub>3</sub> support on visible-light water oxidation with Co<sub>3</sub>O<sub>4</sub> nanoparticles

*Megumi Okazaki,<sup>a</sup> Miharuru Eguchi,<sup>b</sup> Tomoki Uchiyama,<sup>c</sup> Daling Lu,<sup>d</sup> Hideki Kato,<sup>e</sup> Yoshiharu Uchimoto,<sup>c</sup> Masato Kakihana,<sup>e</sup> Kazuhiko Maeda,<sup>a,\*</sup>*

<sup>a</sup> Department of Chemistry, School of Science, Tokyo Institute of Technology, 2-12-1-NE-2  
Ookayama, Meguro-ku, Tokyo 152-8550, Japan

<sup>b</sup> Electronic Functional Materials Group, Polymer Materials Unit, National Institute for Materials  
Science, 1-1 Namiki, Tsukuba, Ibaraki 305-0044, Japan

<sup>c</sup> Graduate School of Human and Environmental Studies, Kyoto University,  
Yoshida-nihonmatsu-cho, Sakyo-ku, Kyoto 606-8501, Japan

<sup>d</sup> Suzukakedai Materials Analysis Division, Technical Department, Tokyo Institute of Technology,  
4259 Nagatsuta-cho, Midori-ku, Yokohama 226-8503, Japan

<sup>e</sup> Institute of Multidisciplinary Research for Advanced Materials, Tohoku University, 2-1-1  
Katahira, Aoba-ku, Sendai 980-8577, Japan

\*To whom corresponding author should be addressed.

TEL: +81-3-5734-2239, FAX: +81-3-5734-2284

Email: maedak@chem.titech.ac.jp

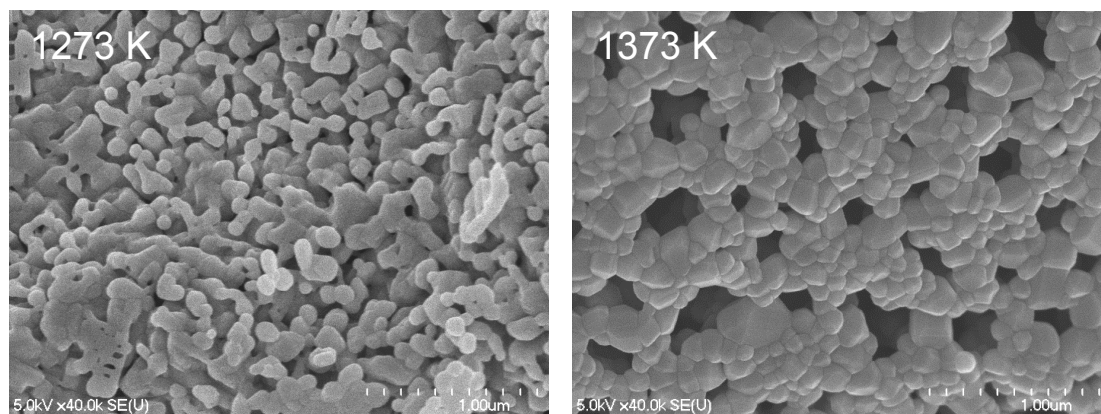

**Fig. S1.** SEM images of SrTiO<sub>3</sub> calcined at 1273 and 1373 K.

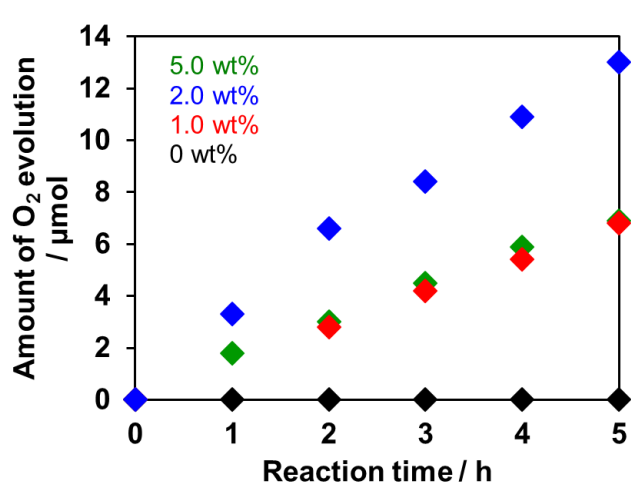

**Fig. S2.** Time courses of O<sub>2</sub> evolution under visible light ( $\lambda > 480$  nm) over SrTiO<sub>3</sub> (1073 K) samples modified with varying amounts of Co<sub>3</sub>O<sub>4</sub>. Reaction conditions: catalyst, 100 mg (with 200 mg La<sub>2</sub>O<sub>3</sub>); reactant solution, aqueous AgNO<sub>3</sub> (10 mM, 140 mL); light source, 300 W xenon lamp fitted with a CM-1 mirror and cutoff filters of L-42 and Y-48.

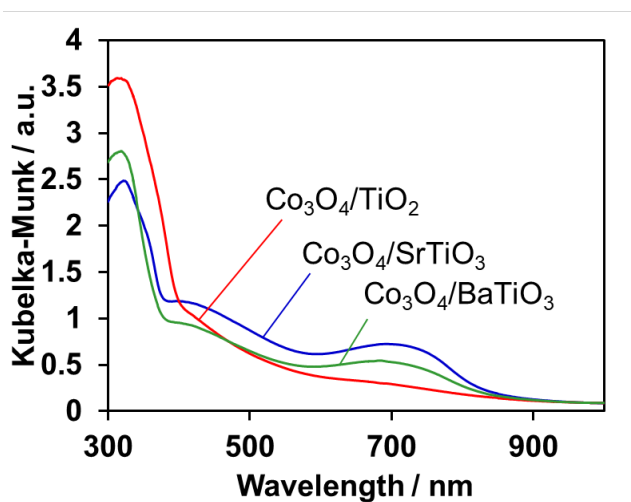

**Fig. S3.** UV-Vis-NIR diffuse reflectance spectra of rutile TiO<sub>2</sub>, SrTiO<sub>3</sub> (PC-1073 K), and BaTiO<sub>3</sub> (PC-1073 K) further modified with 2.0 wt% Co<sub>3</sub>O<sub>4</sub>.

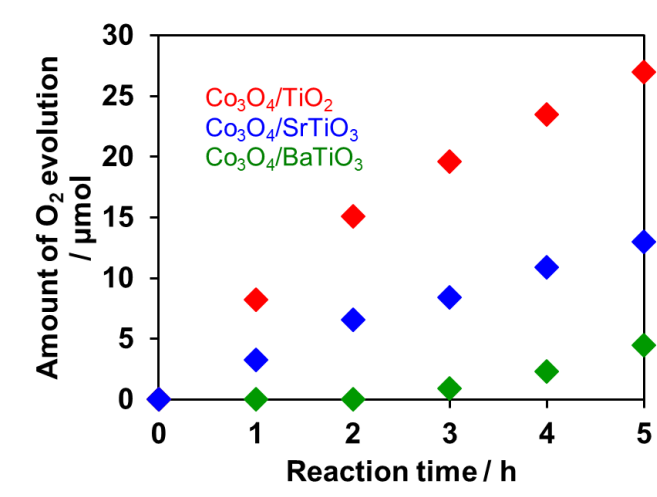

**Fig. S4.** O<sub>2</sub> evolution over 2.0 wt% Co<sub>3</sub>O<sub>4</sub>-loaded semiconductors (see Fig. S3) under visible light ( $\lambda > 480$  nm). Reaction conditions: catalyst, 100 mg (with 200 mg La<sub>2</sub>O<sub>3</sub>); reactant solution, aqueous AgNO<sub>3</sub> (10 mM, 140 mL); light source, 300 W xenon lamp fitted with a CM-1 mirror and cutoff filters of L-42 and Y-48.

**Table S1.** Dependence of the O<sub>2</sub> evolution rate over 2.0 wt% Co<sub>3</sub>O<sub>4</sub>-loaded SrTiO<sub>3</sub> (1073 K) on the incident light cutoff wavelength<sup>a</sup>

| Entry | Wavelength of incident light / nm | Rate of O <sub>2</sub> evolution / $\mu\text{mol h}^{-1}$ |
|-------|-----------------------------------|-----------------------------------------------------------|
| 1     | 480 <                             | 2.0                                                       |
| 2     | 600 <                             | 1.3                                                       |
| 3     | 720 <                             | 0.7                                                       |
| 4     | 800 <                             | 0.4                                                       |
| 5     | 850 <                             | N.D.                                                      |

<sup>a</sup> Reaction conditions: catalyst, 100 mg (La<sub>2</sub>O<sub>3</sub> 200 mg); reactant solution, aqueous AgNO<sub>3</sub> (10 mM, 140 mL); light source, 300 W xenon lamp fitted with a total reflection mirror, a L-42 cutoff filter and another cutoff filter. Here an output current of xenon lamp was 10 A.
